# Supplementary material for: Transcription factor ASCL2 is required for development of the glycogen trophoblast cell lineage
Source: PLOS journal article supplement (doi:10.1371/journal.pgen.1007587), 2018-08-10
Supplement: S8 (10.1371/journal.pgen.1007587.s008) [file journal.pgen.1007587.s008]

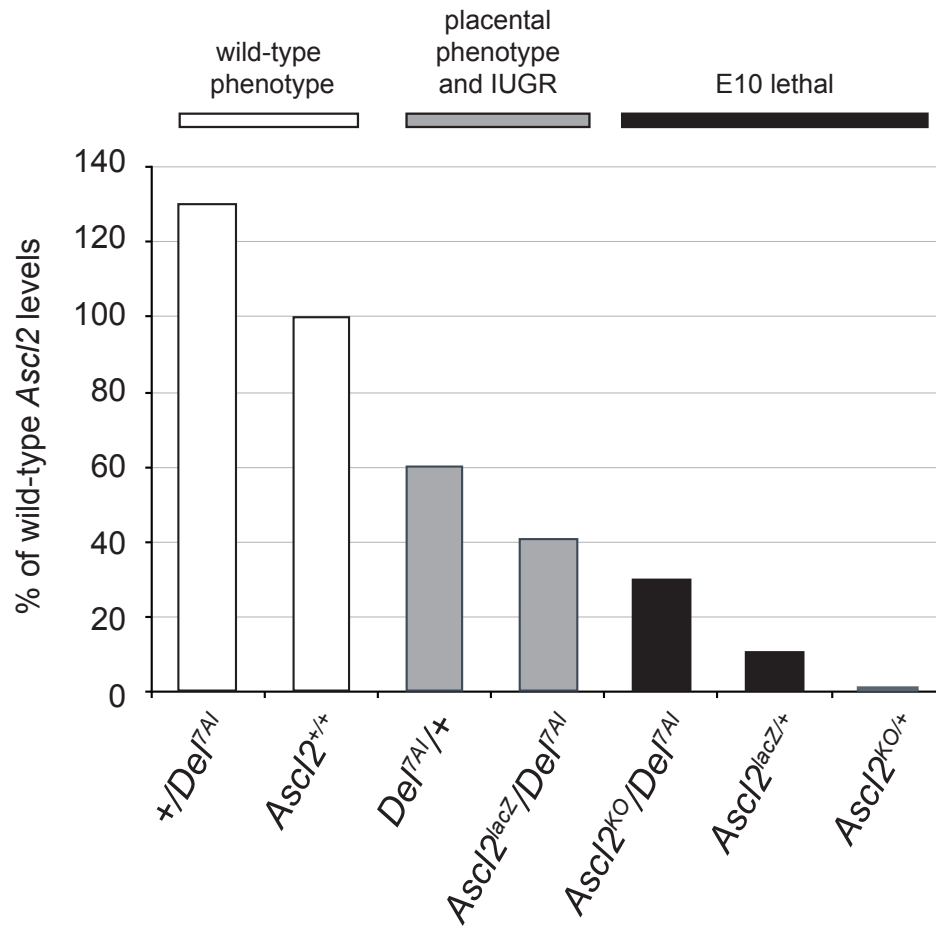

**S8 Fig. Dosage-sensitive effects of *Ascl2* mRNA levels on placental phenotype.**

For each genotype, the approximate total *Ascl2* mRNA levels are presented as a percentage of the wild-type levels, set at 100%.
